# Supplementary material for: Stable Isotope Tracing Uncovers Reduced γ/β-ATP Turnover and Metabolic Flux Through Mitochondrial-Linked Phosphotransfer Circuits in Aggressive Breast Cancer Cells
Source: PubMed Central journal article supplement (PMC9194814; doi:10.3389/fonc.2022.892195), 2022-05-31

AK2: mRNA Expression Zscores, RSEM (Batch normalized from Illumina HiSeq\_RNASeqV2)

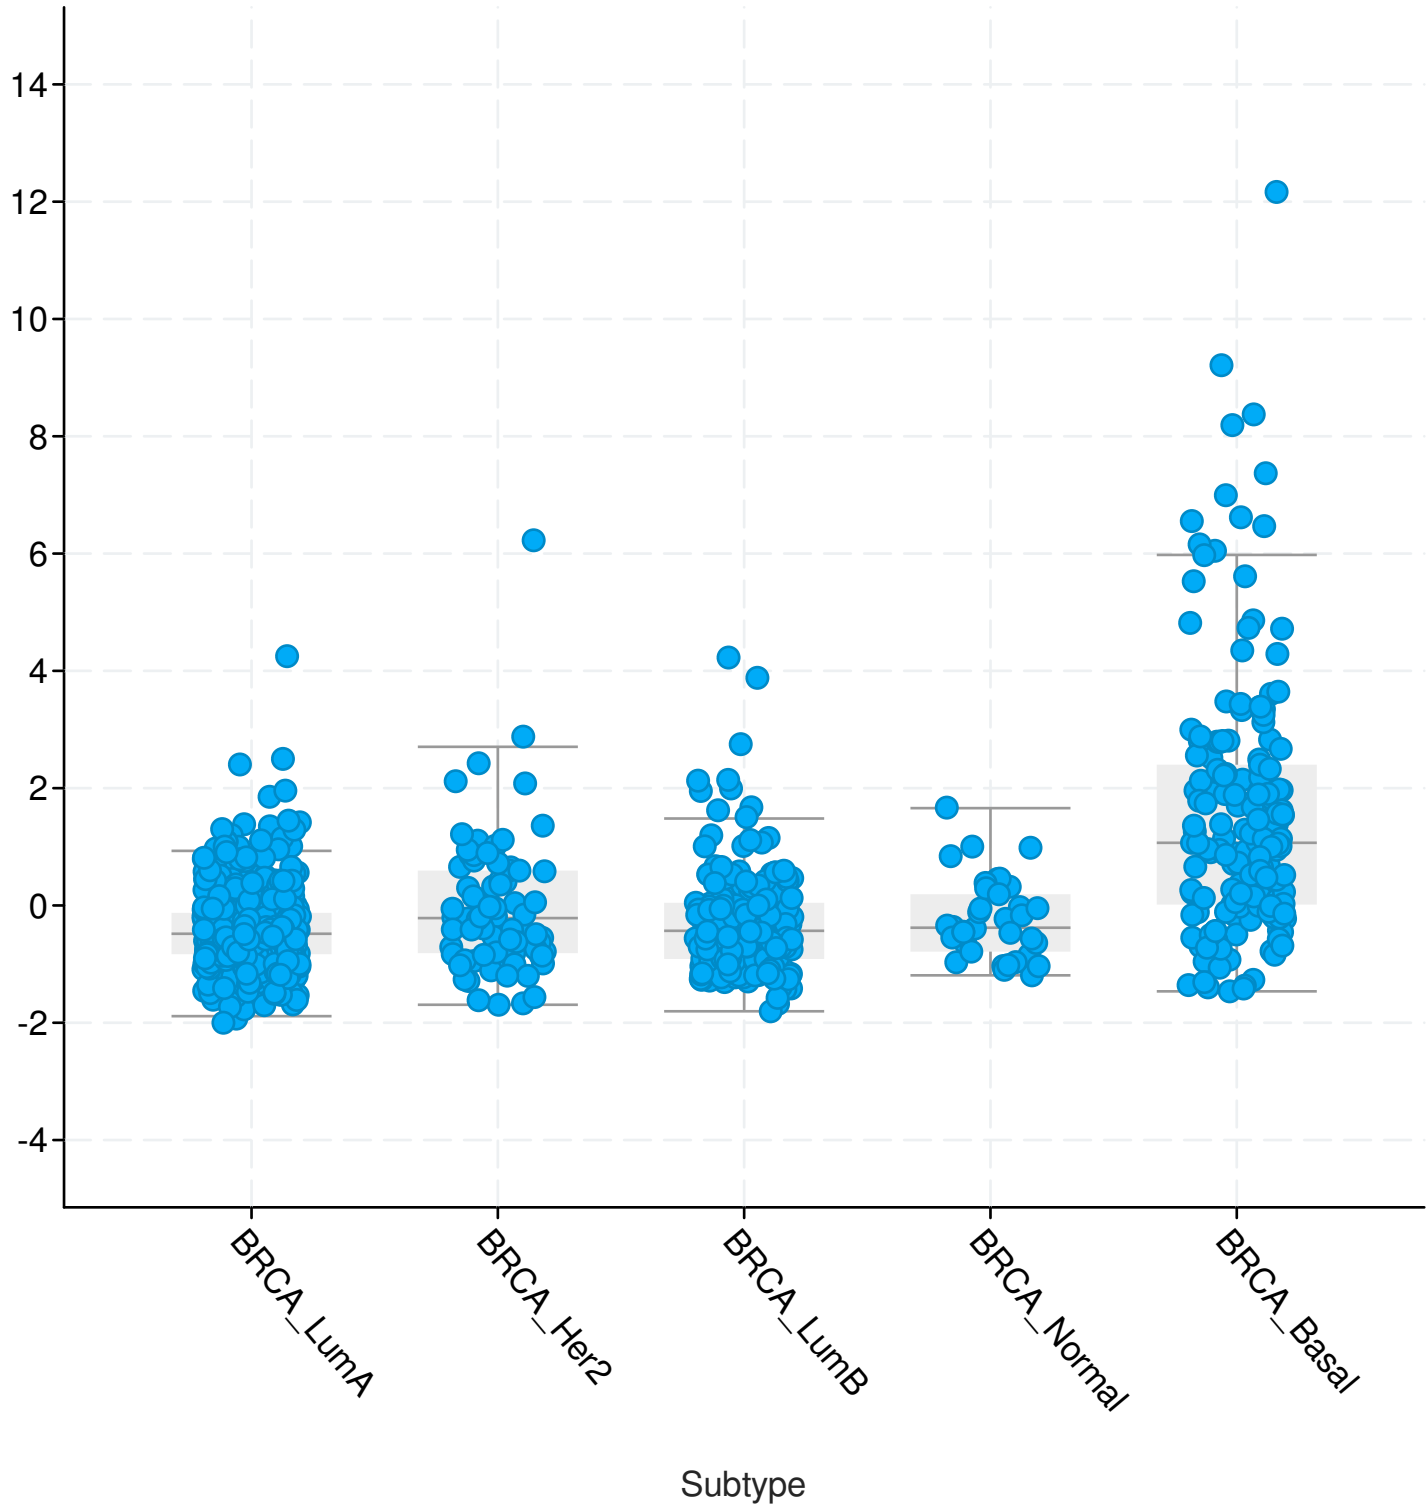

Supplement: Image_2.pdf [file Image_2.pdf]
